# Supplementary material for: Discovery and characterization of a sulfoquinovose mutarotase using kinetic analysis at equilibrium by exchange spectroscopy
Source: PubMed Central journal article supplement (PMC5902678; doi:10.1042/bcj20170947), 2018-04-16

## SUPPORTING INFORMATION

### Discovery and characterization of a sulfoquinovose mutarotase using kinetic analysis at equilibrium by exchange spectroscopy

Palika Abayakoon, James P. Lingford, Yi Jin, Christopher Bengt, Gideon J. Davies, Shenggen Yao,\* Ethan D. Goddard-Borger,\* Spencer J. Williams\*

#### Contents

|                                                                                                      |    |
|------------------------------------------------------------------------------------------------------|----|
| <i>HsSQM</i> plasmid and sequence data.....                                                          | 2  |
| Table S1. Pairwise sequence comparisons of <i>HsSQM</i> with various hexose mutarotases.* .....      | 3  |
| Figure S1. Mutarotation of SQ monitored by polarimetry.....                                          | 4  |
| 1D <sup>1</sup> H NMR spectra .....                                                                  | 5  |
| Sulfoquinovose (600 MHz, 15 mM, D <sub>2</sub> O).....                                               | 5  |
| Glucose-6-phosphate (600 MHz, 15 mM, D <sub>2</sub> O).....                                          | 5  |
| 2D <sup>1</sup> H- <sup>1</sup> H NOESY spectra with 1D spectrum projected onto F1 and F2 axes ..... | 6  |
| Sulfoquinovose (5 mM), no enzyme.....                                                                | 6  |
| Sulfoquinovose (5 mM), with <i>HsSQM</i> .....                                                       | 6  |
| D-Glucose-6-phosphate (5 mM), no enzyme.....                                                         | 7  |
| D-Glucose-6-phosphate (5 mM), with <i>HsSQM</i> .....                                                | 7  |
| D-Glucuronic acid (5 mM), no enzyme .....                                                            | 8  |
| D-Glucuronic acid (5 mM), with <i>HsSQM</i> .....                                                    | 8  |
| D-Glucose (5 mM), no enzyme.....                                                                     | 9  |
| D-Glucose (5 mM), with <i>HsSQM</i> .....                                                            | 9  |
| D-Galactose (5 mM), no enzyme.....                                                                   | 10 |
| D-Galactose (5 mM), with <i>HsSQM</i> .....                                                          | 10 |
| D-Mannose (5 mM), no enzyme .....                                                                    | 11 |
| D-Mannose (5 mM), with <i>HsSQM</i> .....                                                            | 11 |

## HsSQM plasmid and sequence data

| plasmid     | resistance | details                                                                                                                         |
|-------------|------------|---------------------------------------------------------------------------------------------------------------------------------|
| pET29-HsSQM | Kan        | C-terminal His <sub>6</sub> -tagged <i>Herbaspirillum seropedicae</i> strain AU14040 sulfoquinovose mutarotase (WP_069374721.1) |

### pET29-HsSQM

#### CDS:

```
ATGTCCGGCAGCTCTTGCCTCCCTGACACTTGCCCAAGGACCGTGGCAAAGTGCCTGCTGCCTGCACTGGGCGGTGCGATTGC
AAGCGCCAGCTGGCGTGGT CAGCCCGT GCTGCGCCCGAGCGT CGAGGCACAGCTGCAGCAGGGCCTGGTTAGACGCTCTGCCT
GCTATCCGCTGCTGCCGTTTAGTAACCGTATCGGAAACGCGCAATTCGCCTTTGATGGCCAGACATACGCGCTGATTGCCAAC
TTTGACAACGAACCGCACGCTATCCACGGGCTGGGCTTT CAGCGCGCGTGGCAGGTT CAGTCTAGCTCGGCGGAAAGTCTTAC
TATGCAGCTCACCCACGCTCGCCGAGGCCGGGT CAGTGGCCGTTTGCCTTGCCTGCCACCCAGGTGATTGCCATCGAAGGCG
ACGATCTGGT GCTGCGCCTGGAAAGTGGAAAAATACCGATCATCGCCGCGCCCATGCGGCCTGGGCTGGCATCCGTTTTTTCCG
CTGGATAGCGCGGCGCAGCCGACCCAGCTGCAGACCCATTGGCAAAGCGATGCTGGTAAACGGGCCAGACAAACTTCCGTGCGG
CAGCACGGCCCTCCGGATACGACCCAACTGGATACCTTAGTGATTGATAAATTGCTTTACCGGCTGGAGCGGCCAGGCCGTG
TTACCGGCCCGCATCATCGTATTACCCCTGACAGCGAGCCCGACCCTGCGTTGCGCGGTGCTGTTTTGCCCCGCCGGGGCAGCCG
TTCTTCGCGTTTGAACCGGTGAGCCATCCGAACAATGCCCTGCACGCGCTTGCGCCGCGCATGCACATCCTGGAACCCCGTCA
GTGCTGGCGGGCGAAATGCGCCTGAGCCTGT CGACCGCTCCGAGCATTCTGGCGCCGCACTCGAGCACCACCACCACC
ACTGA
```

#### Translation:

```
MSAALASLTLAQQPWQVRVLPALGGAIASASWRGQPVLRPSVEAQLQQGLVRRSACYPLL
PFSNRI GNAQFAFDGQTYALI ANFDNEPHAI HGLGFQRAWQVQSSSAESLTMQLTHASPS
PGQMPFALRATQVI AI EGDDLVLRL EVENTDHRRAPCGLGVHPFFPLDSAAQPTQLQTHW
QAMLVNGPDKLPCGSTAPPDITQLDTLVI DNCFTGWSGQAVVTGPHHRI TLTASPTLRCA
VLFRRPPQPFPAFEPVSHPNNALHGVAPAMHI LEPGQCLAGEMRLSLSTAPSI LAAALEH
HHHHH*
```

**Table S1. Pairwise sequence comparisons of HsSQM with various hexose mutarotases.\***

| <i>H. seropediaceae</i>        | <i>P. putida</i>                | <i>E. coli</i>             | <i>L. lactis</i>              | <i>S. cerevisiae</i>         |                                           |
|--------------------------------|---------------------------------|----------------------------|-------------------------------|------------------------------|-------------------------------------------|
| <b>HsSQM</b><br>WP_069374721.1 | <b>PpSQ_00415</b><br>KHL76357.1 | <b>YihQ</b><br>NP_418315.3 | <b>GalM</b><br>WP_039116219.1 | <b>YMR099C</b><br>DAA09996.1 | <b>% identity</b><br><b>(%similarity)</b> |
|                                | 35<br>(49)                      | 19<br>(38)                 | 13<br>(26)                    | 13<br>(28)                   | <b>HsSQM</b>                              |
|                                |                                 | 19<br>(37)                 | 12<br>(24)                    | 15<br>(29)                   | <b>PpSQ_00415</b>                         |
|                                |                                 |                            | 12<br>(29)                    | 11<br>(23)                   | <b>YihQ</b>                               |
|                                |                                 |                            |                               | 14<br>(23)                   | <b>GalM</b>                               |
|                                |                                 |                            |                               |                              | <b>YMR099C</b>                            |

\* Calculated using the “Sequence Manipulation Suite” and the following groupings of similar amino acids: GAVLI, FYW, CM, ST, KRH, DENQ, P.

See: [http://www.bioinformatics.org/sms2/ident\\_sim.html](http://www.bioinformatics.org/sms2/ident_sim.html), Stothard, P. *Biotechniques*, 2000, 28, 1102–1104.

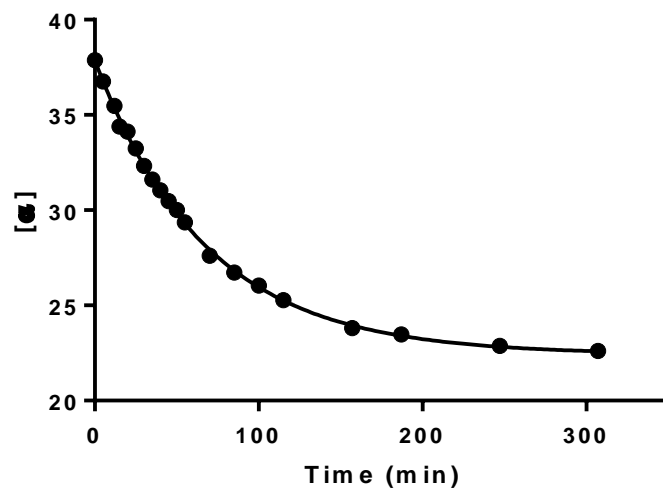

**Figure S1. Mutarotation of SQ monitored by polarimetry.**

4-Nitrophenyl  $\alpha$ -D-sulfoquinovoside in 50 mM sodium phosphate, 150 mM NaCl in H<sub>2</sub>O (pH 7.1) was treated with sulfoquinovosidase, and after 5 min, the specific rotation was monitored as a function of time. pH 7.1, 26 $\pm$ 1 °C.

**1D <sup>1</sup>H NMR spectra**

Sulfoquinovose (600 MHz, 15 mM, D<sub>2</sub>O)

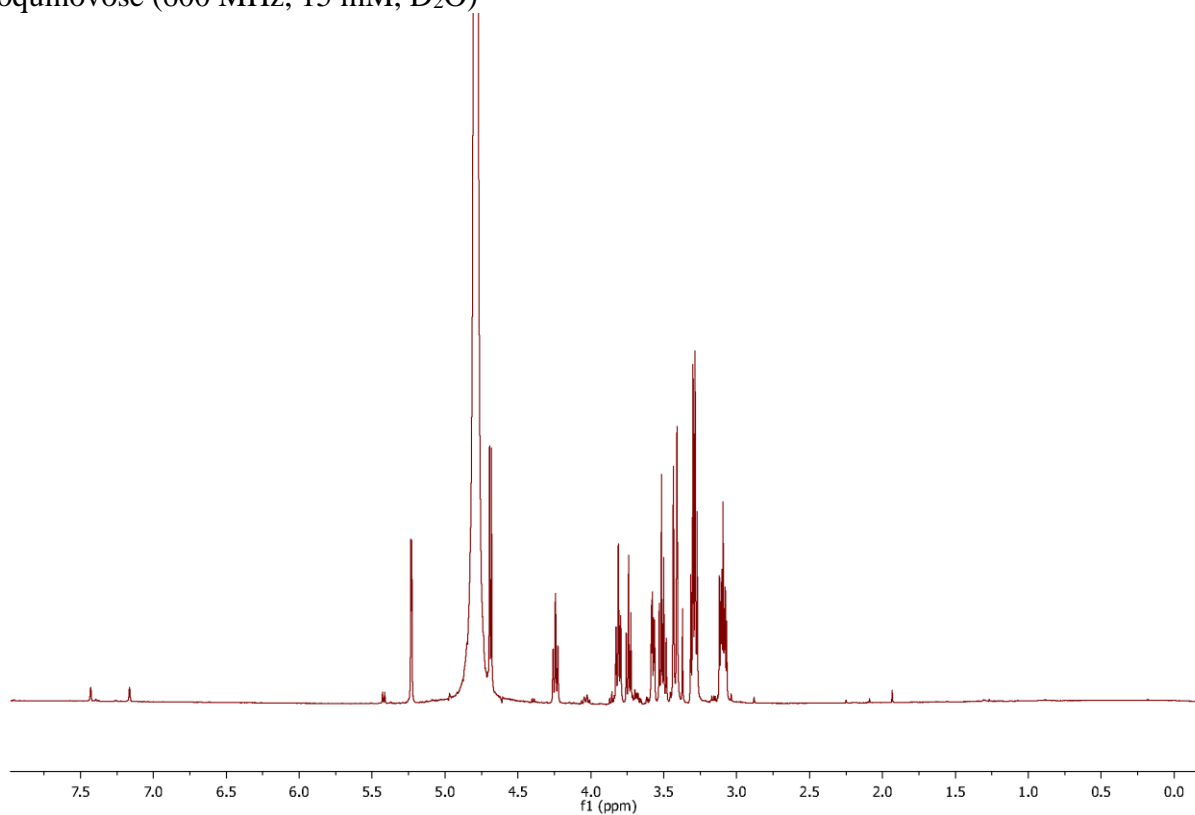

Glucose-6-phosphate (600 MHz, 15 mM, D<sub>2</sub>O)

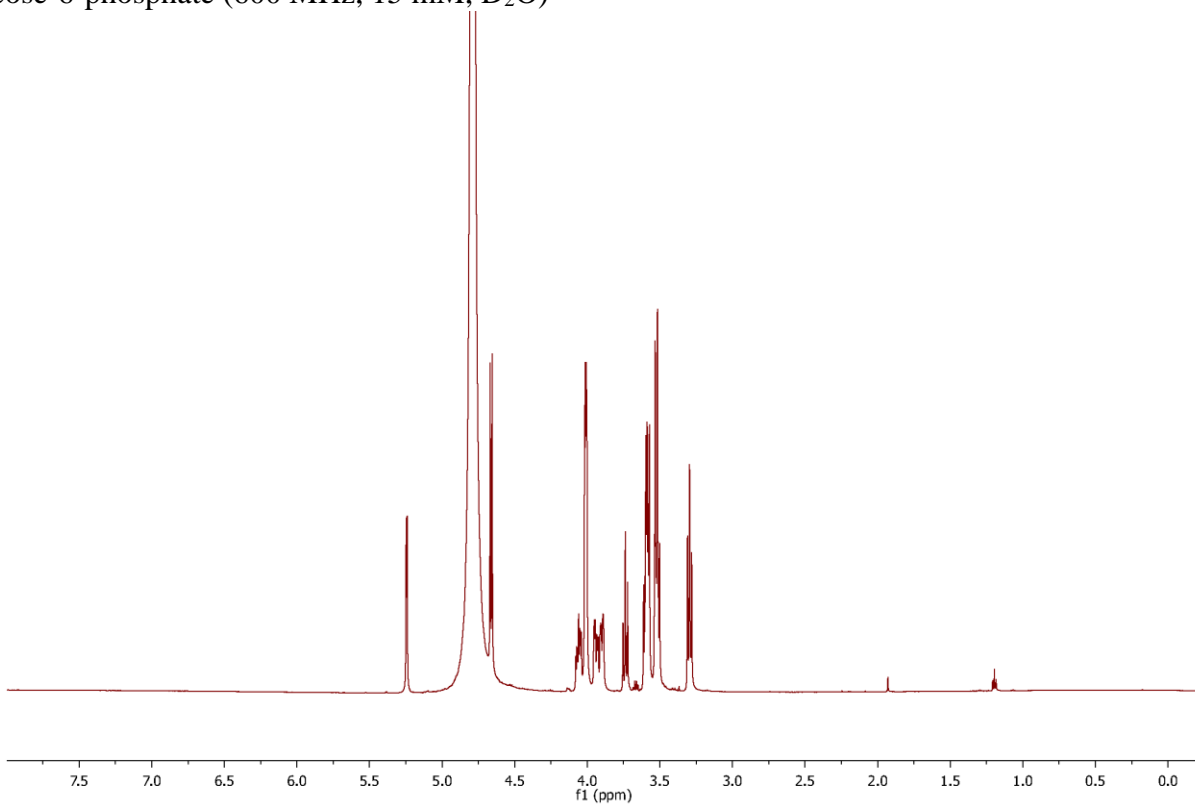

**2D  $^1\text{H}$ - $^1\text{H}$  NOESY spectra with 1D spectrum projected onto F1 and F2 axes**  
Sulfoquinovose (5 mM), no enzyme

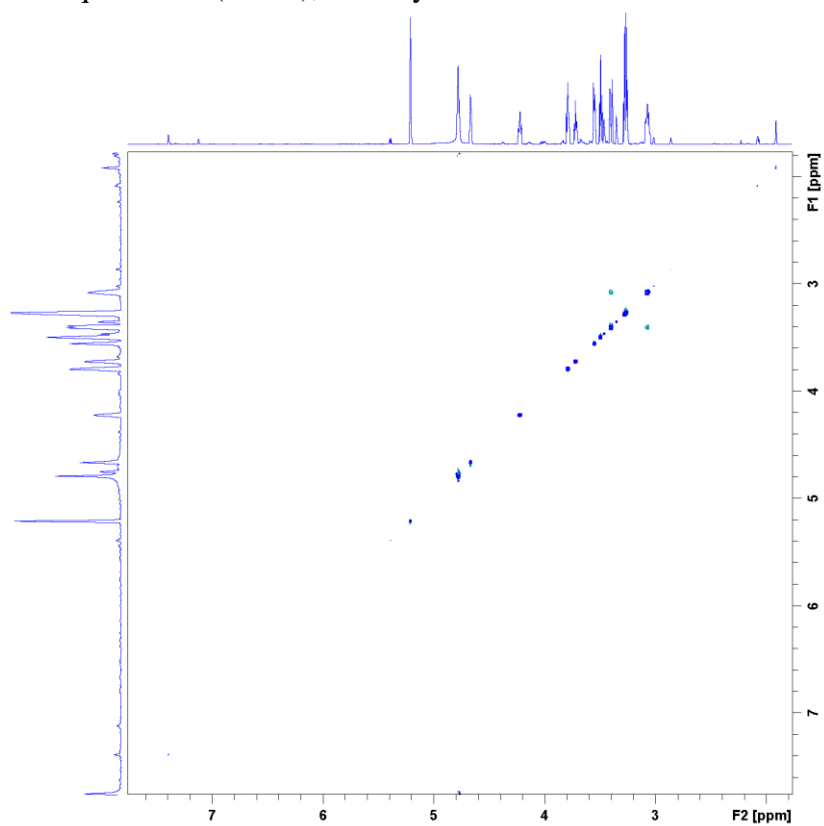

Sulfoquinovose (5 mM), with *HsSQM*

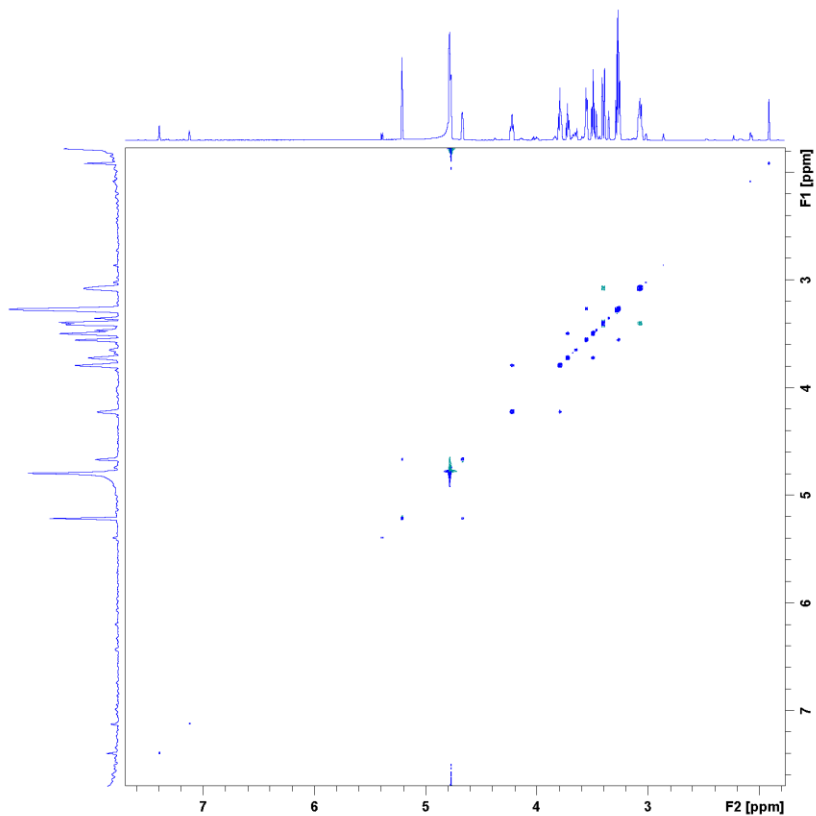

D-Glucose-6-phosphate (5 mM), no enzyme

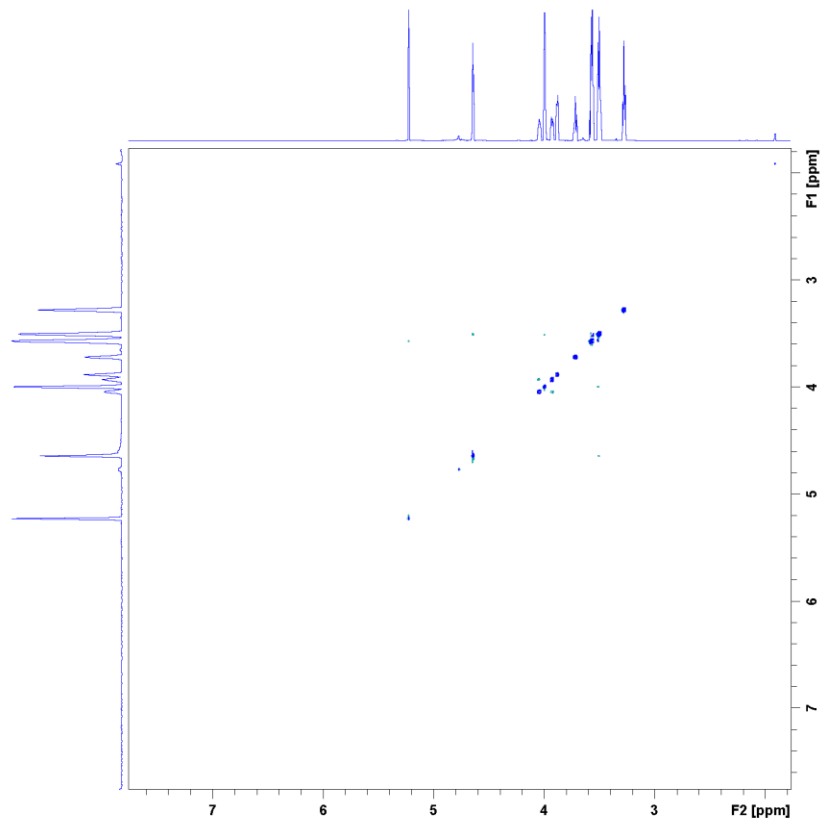

D-Glucose-6-phosphate (5 mM), with *HsSQM*

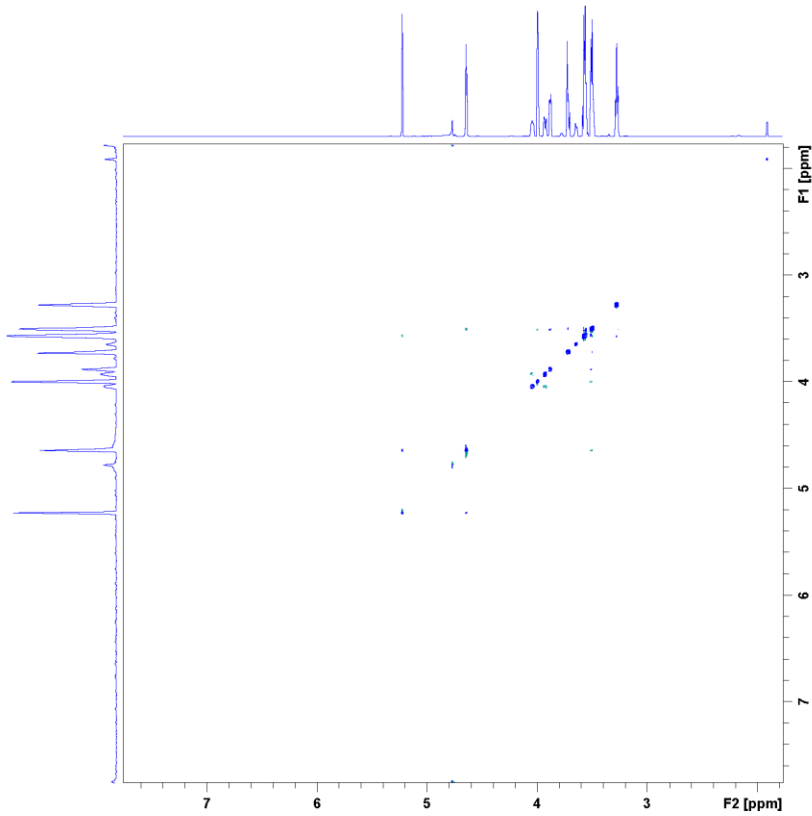

D-Glucuronic acid (5 mM), no enzyme

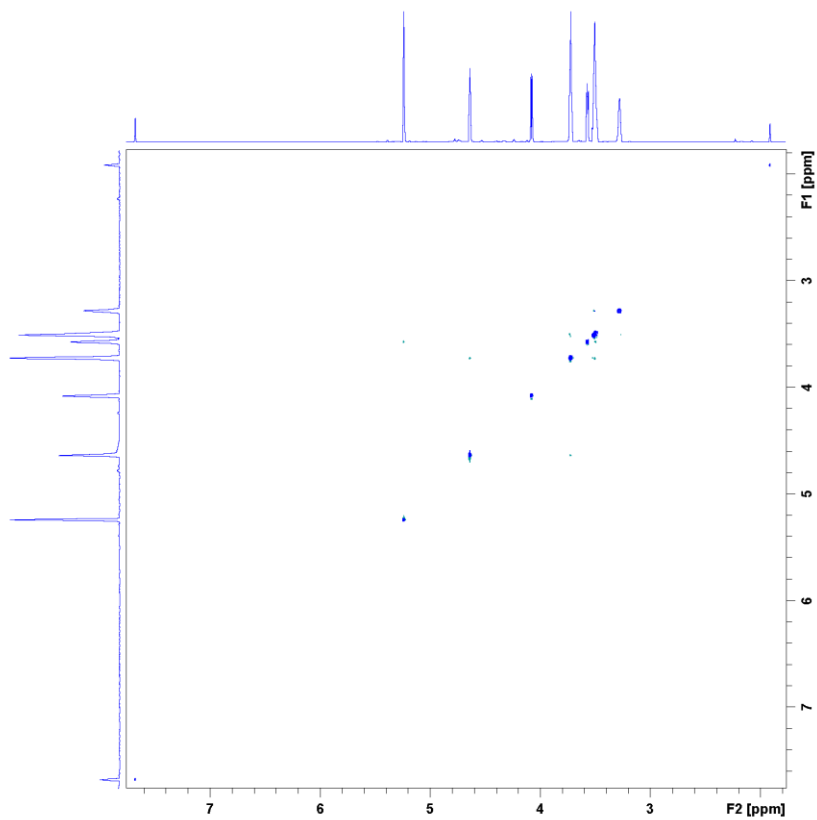

D-Glucuronic acid (5 mM), with *HsSQM*

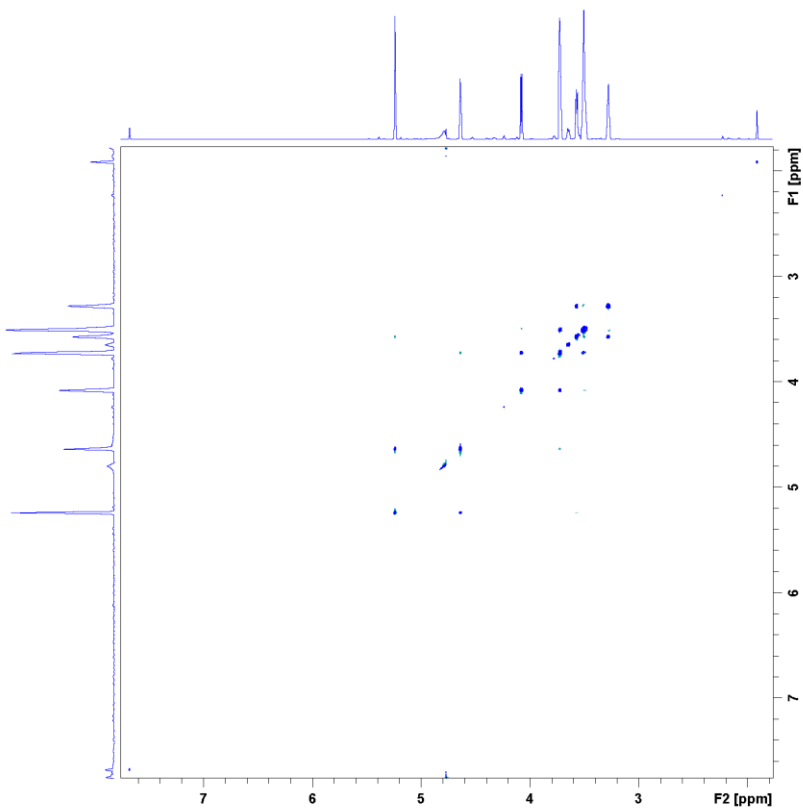



D-Glucose (5 mM), no enzyme

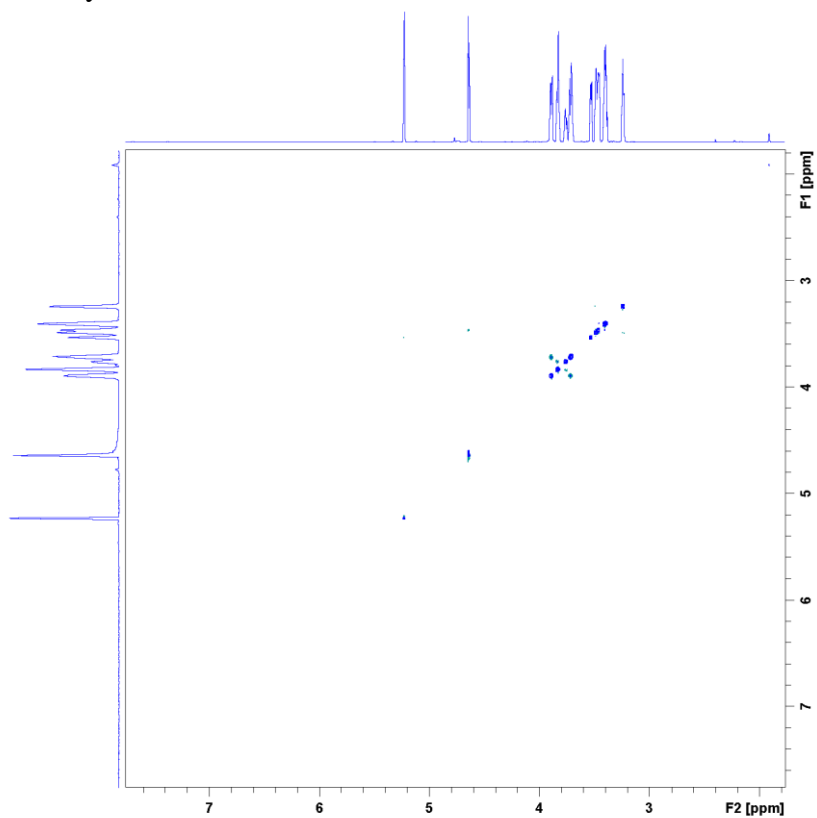

D-Glucose (5 mM), with *HsSQM*

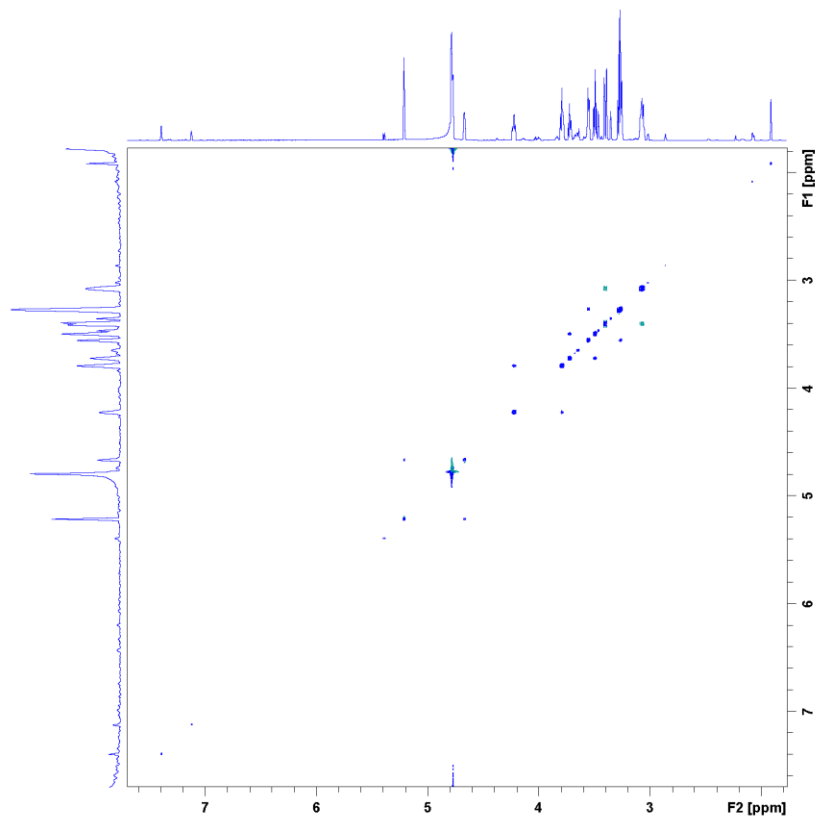

D-Galactose (5 mM), no enzyme

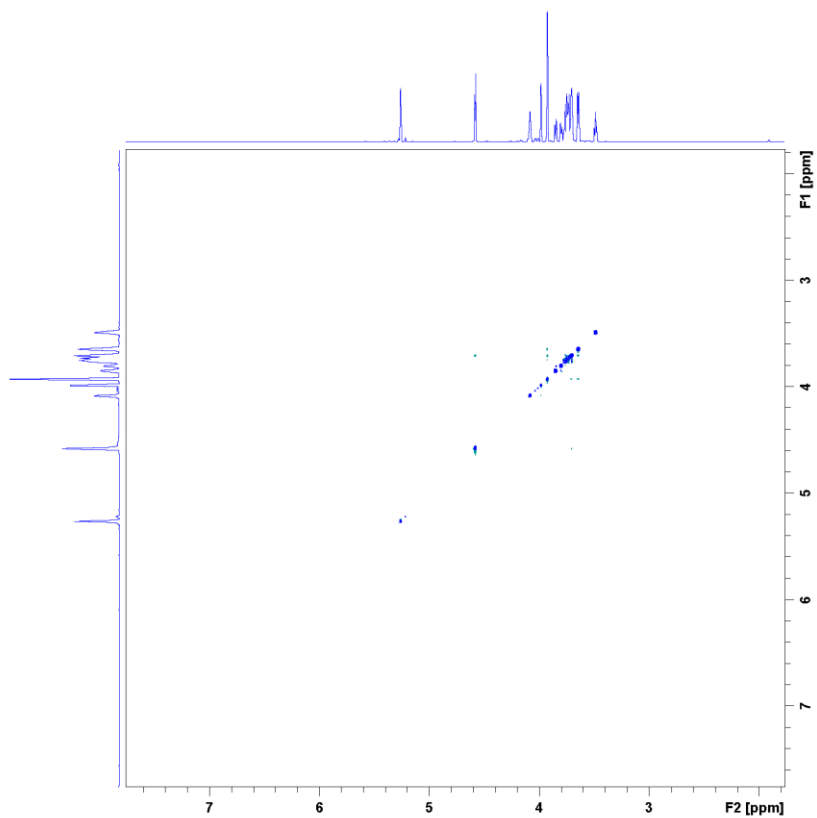

D-Galactose (5 mM), with *HsSQM*

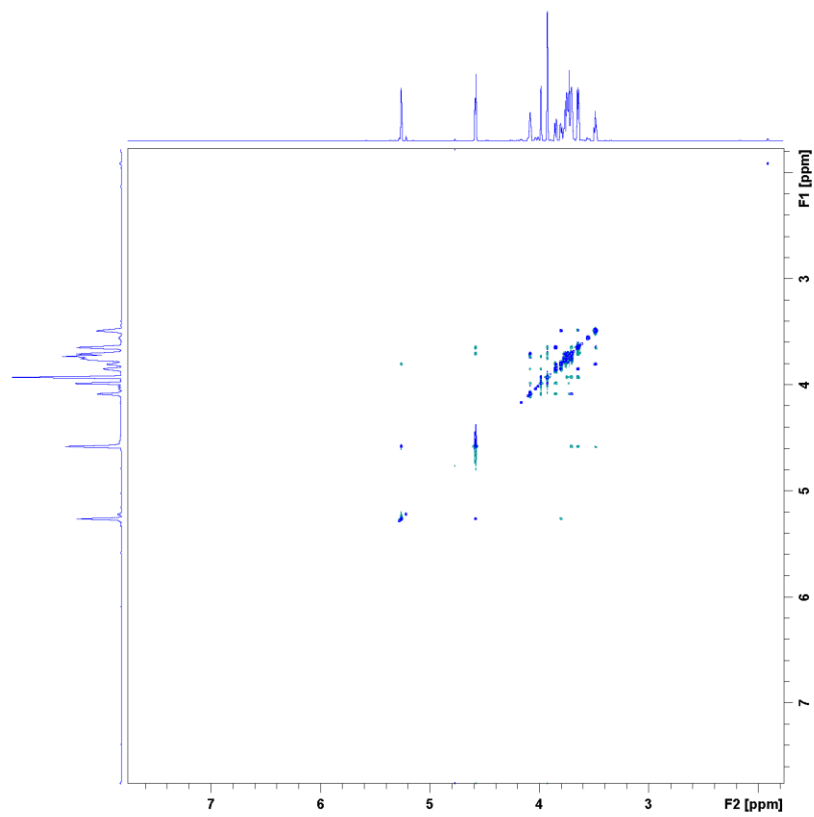

D-Mannose (5 mM), no enzyme

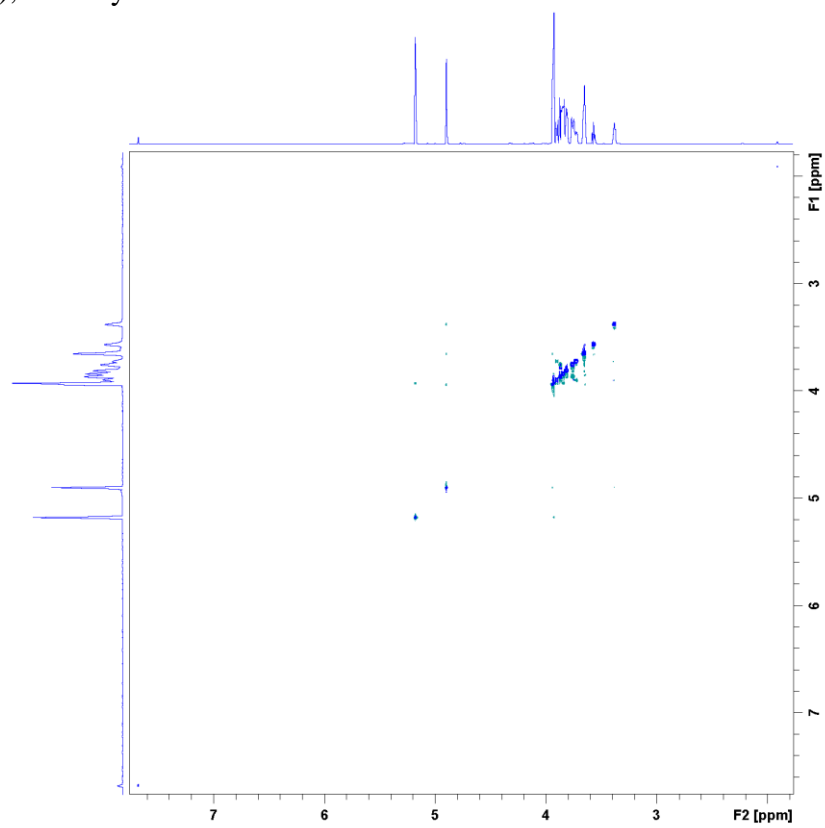

D-Mannose (5 mM), with *HsSQM*

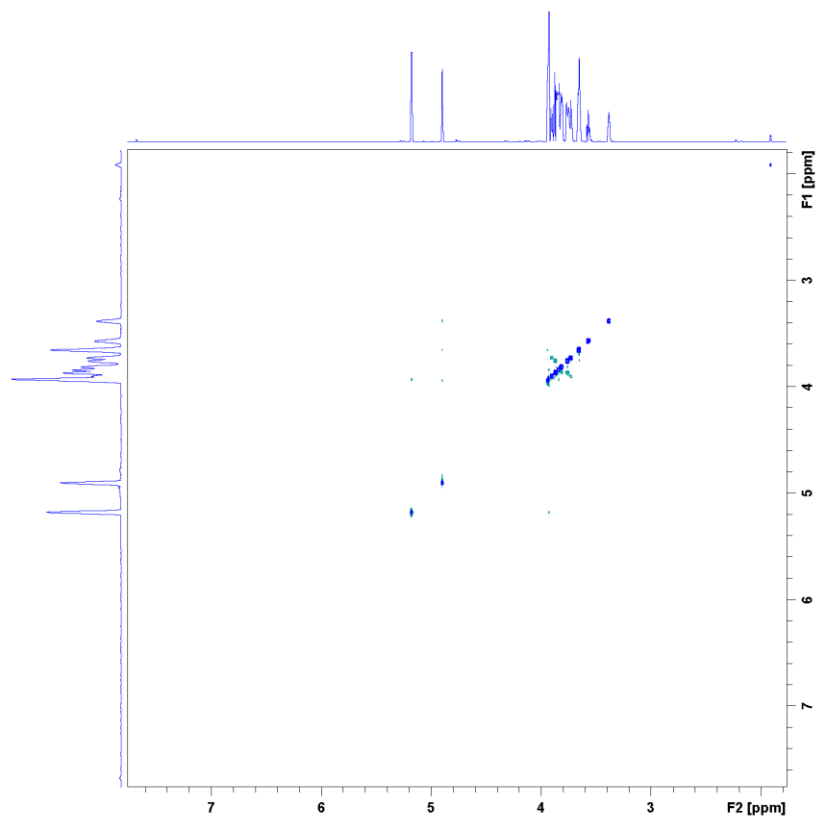

Supplement: BCJ-475-1371-s1.pdf [file BCJ-475-1371-s1.pdf]
